# Supplementary material for: Automated morphological classification and quantification of cerebrospinal fluid extracellular vesicles via AFM and machine learning
Source: Royal Society of Chemistry journal article supplement (doi:10.1039/d5na00665a), 2025-01-01
Supplement: d5na00665a2.pdf [file d5na00665a2.pdf]

For CD9 lower membranes were marked with a chemiluminescent pen at 25 kDa (and 35 kDa).

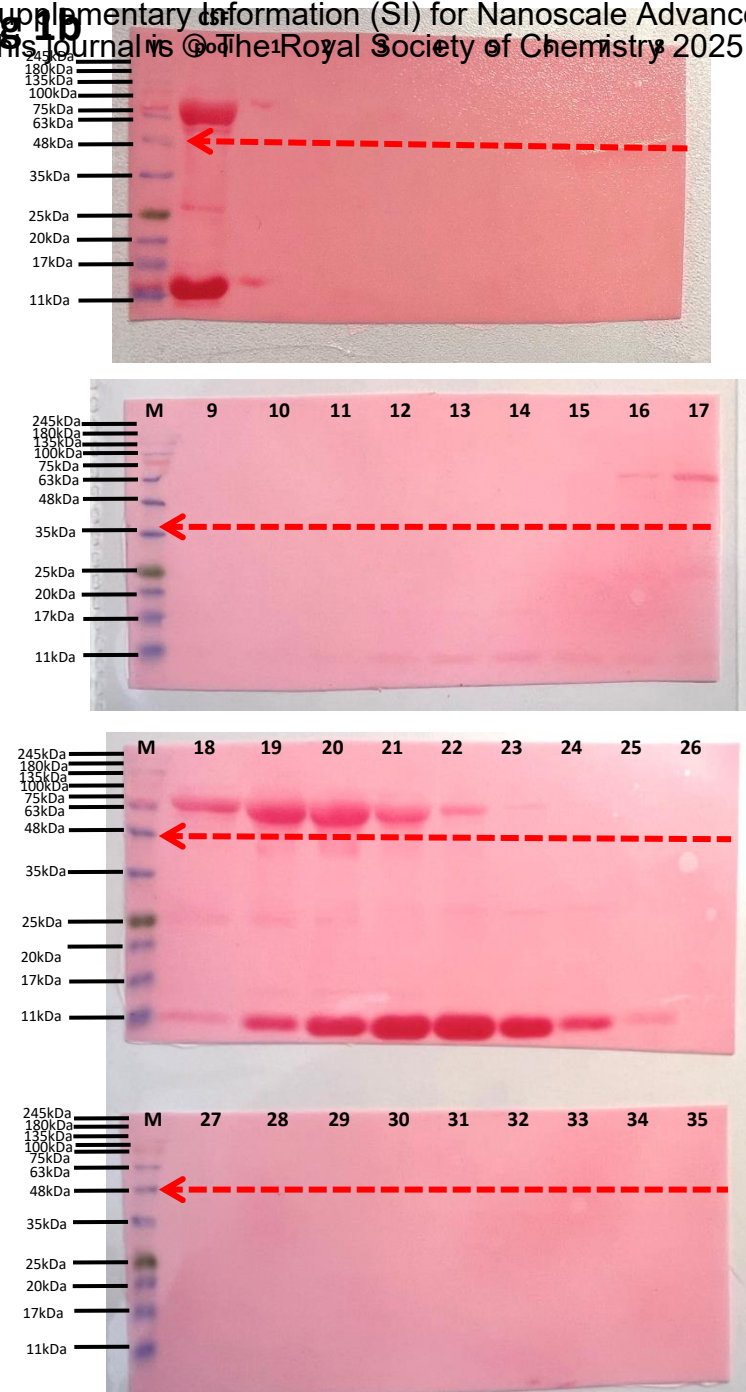

Ponceau S staining, red lines represent cutting lines of the membranes

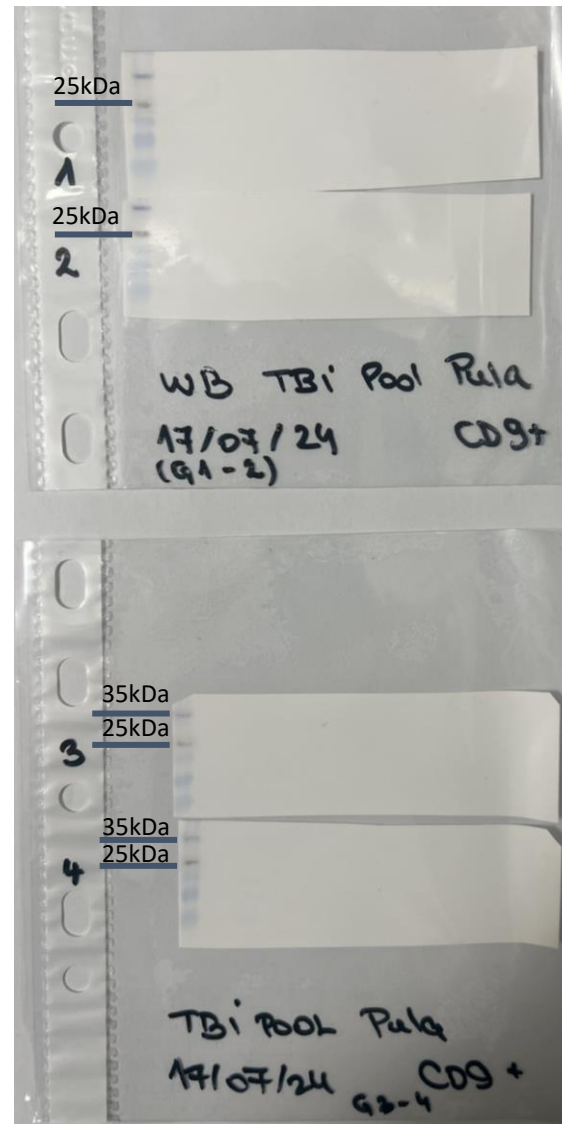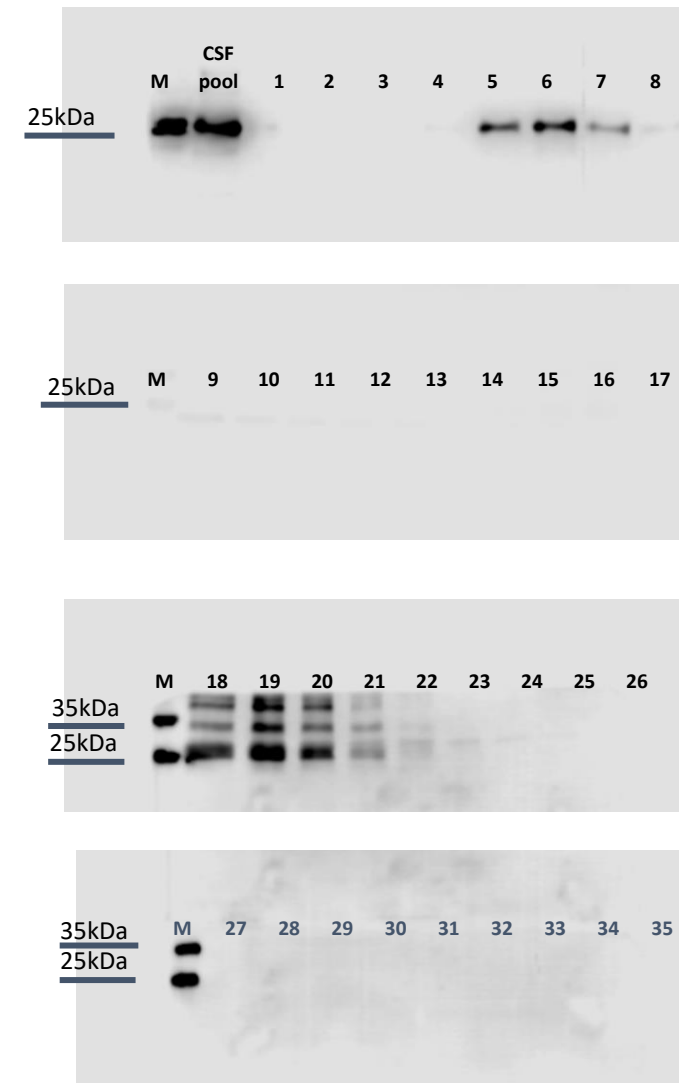

**Fig 1b**

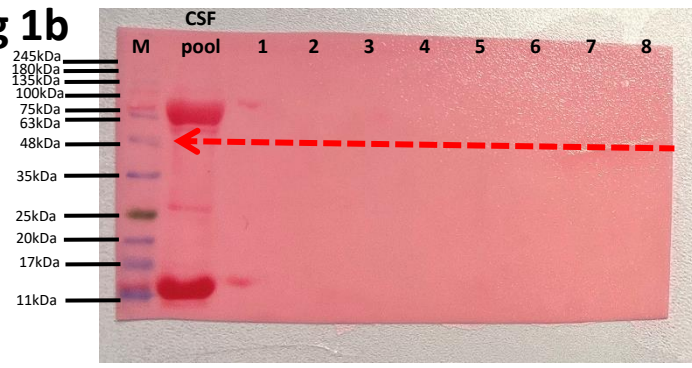

For albumin, upper membranes were marked with a chemiluminescent pen at 63 kDa.

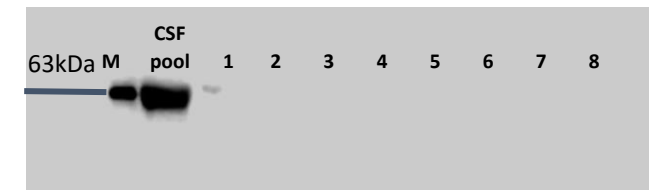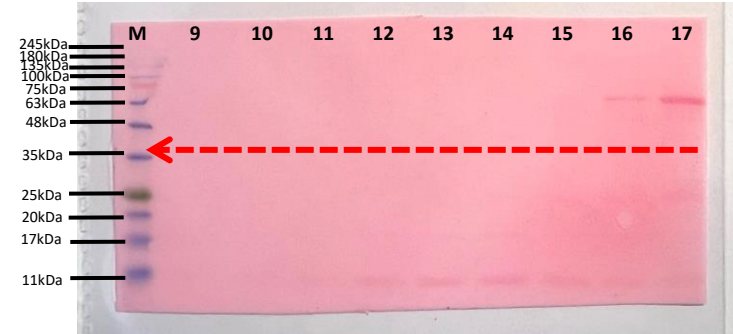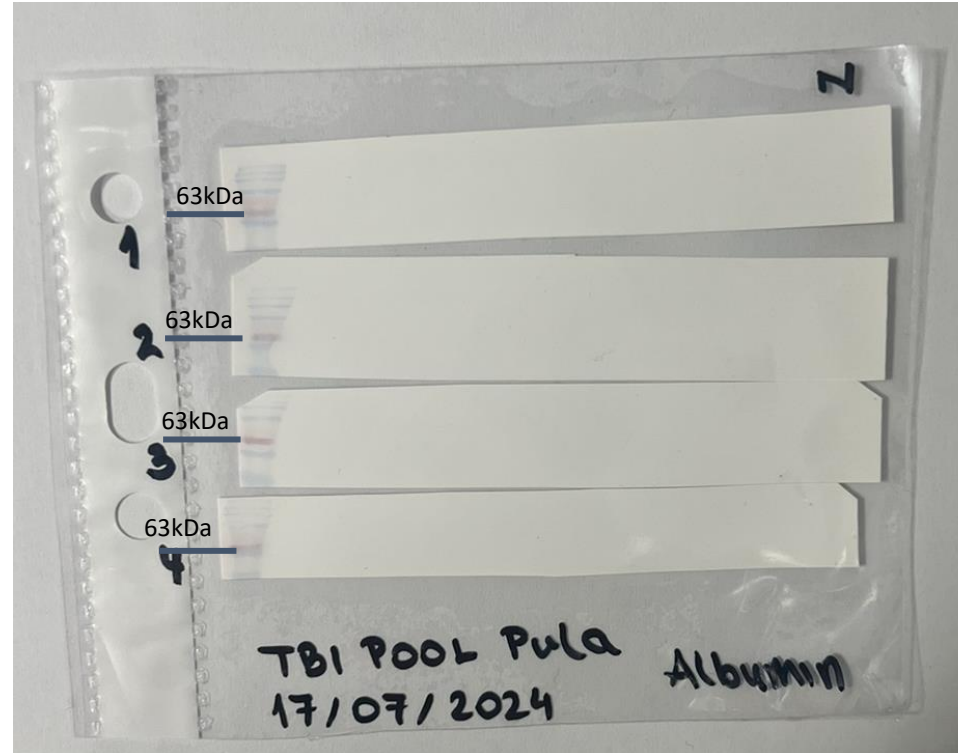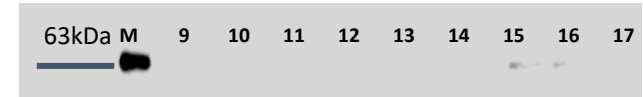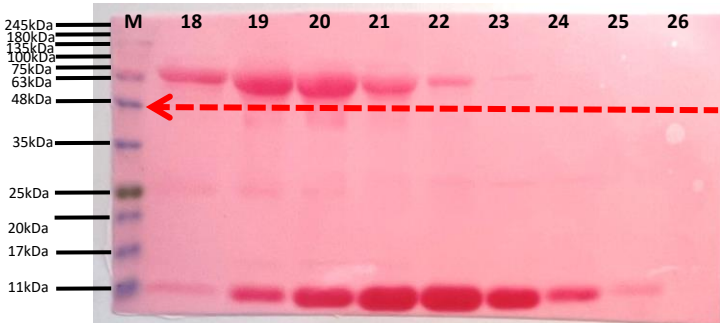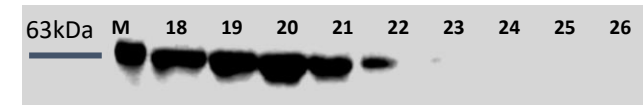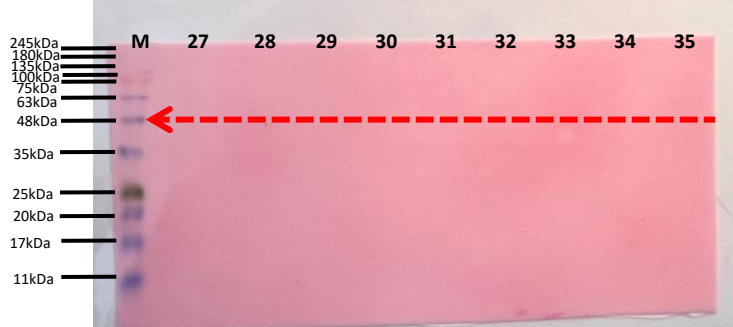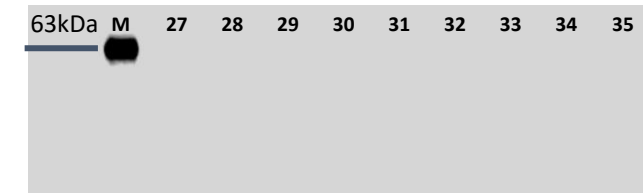

Ponceau S staining, red lines represent cutting lines of the membranes

**Fig 1c**

For albumin upper membranes were marked with a chemiluminescent pen at 63 kDa, for CD9 lower membranes at 25kDa and 35 kDa; for CD81 at 25kDa.

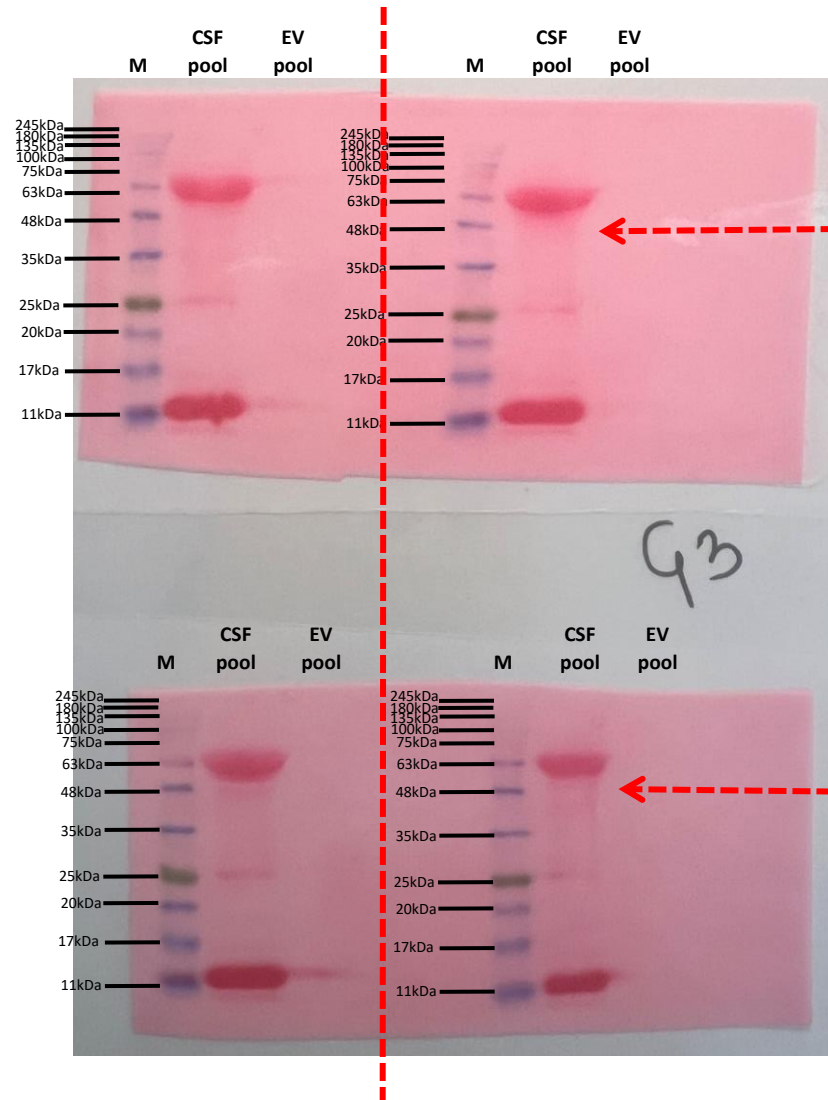

Ponceau S staining, red lines represent cutting lines of the membranes

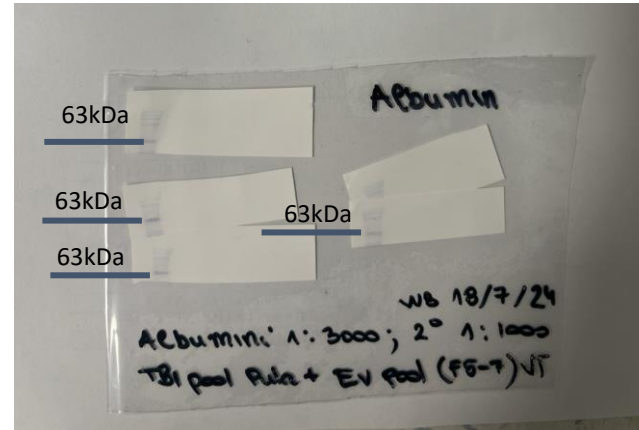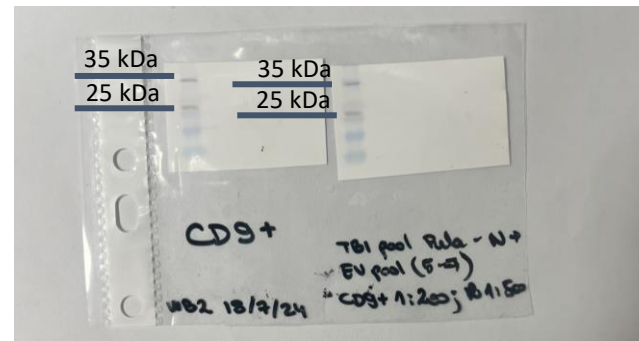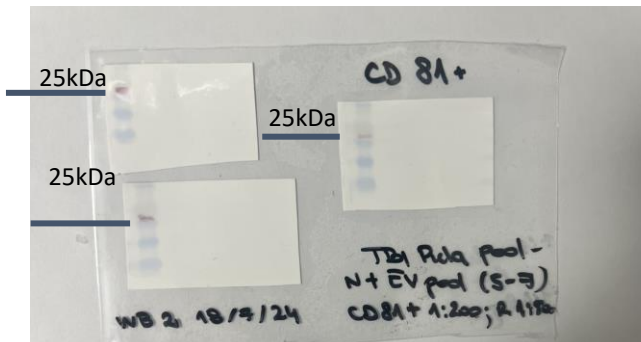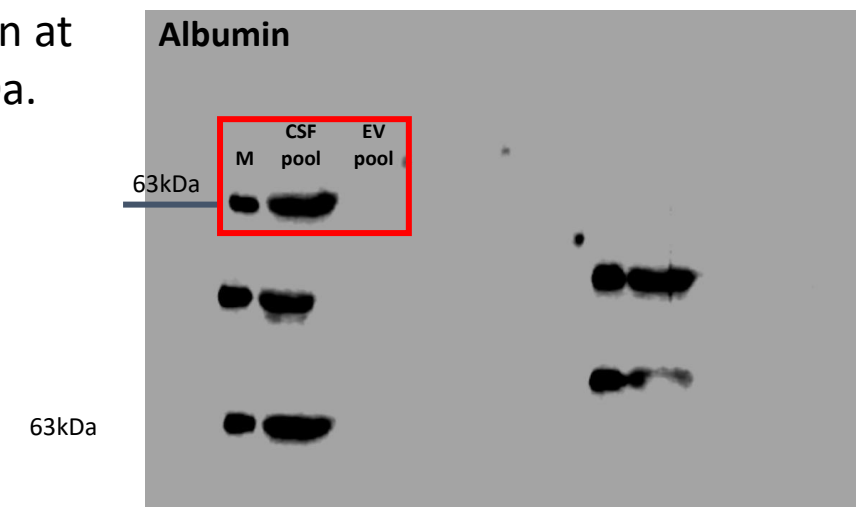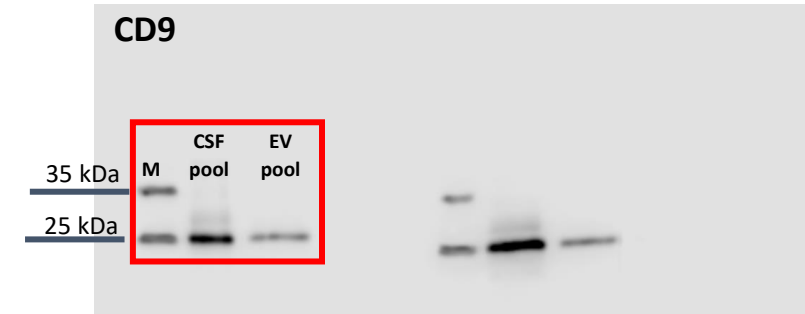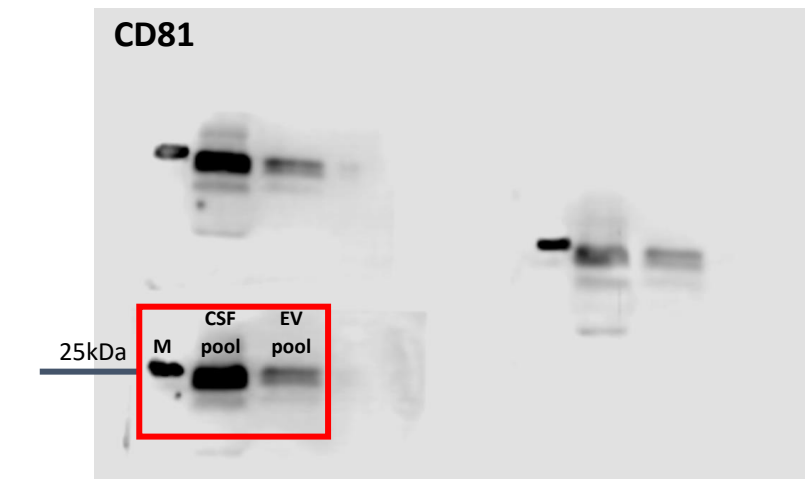

Red squares selected for Figure 1c



**Fig 1c** For Alix upper membranes were marked with chemiluminescent pen at 100 kDa, for TSG101 middle membranes at 48 kDa, for ApoA1 lower membranes at 25 kDa

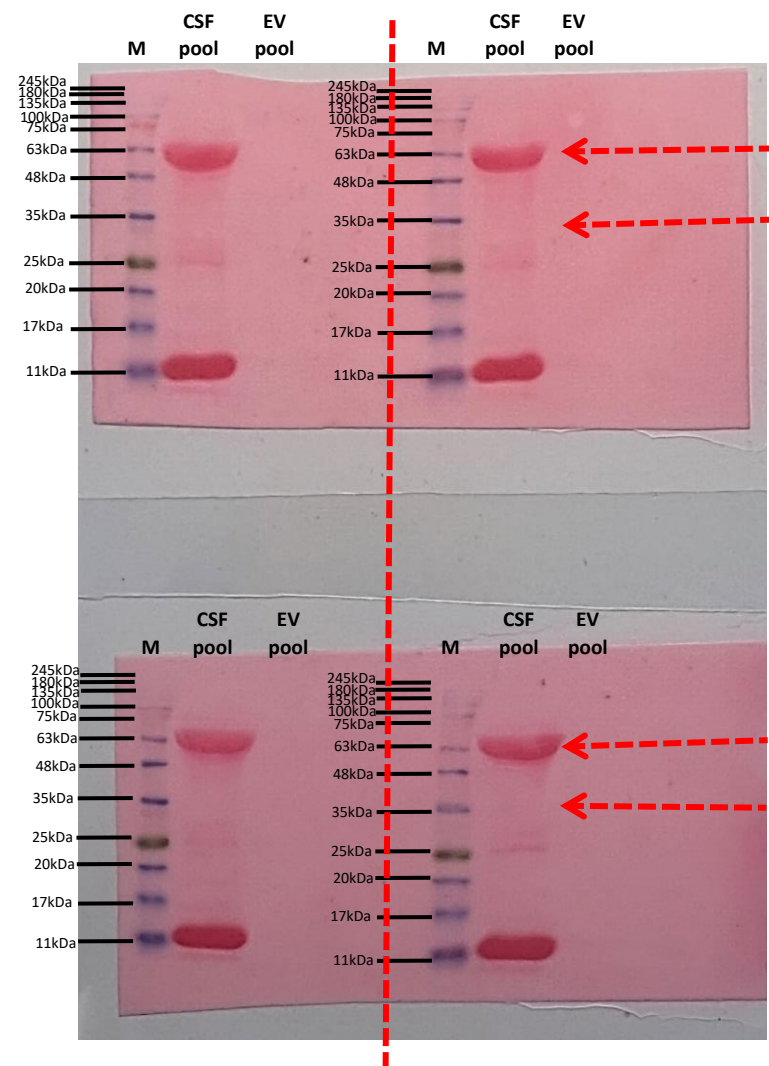

Ponceau S staining, red lines represent cutting lines of the membranes

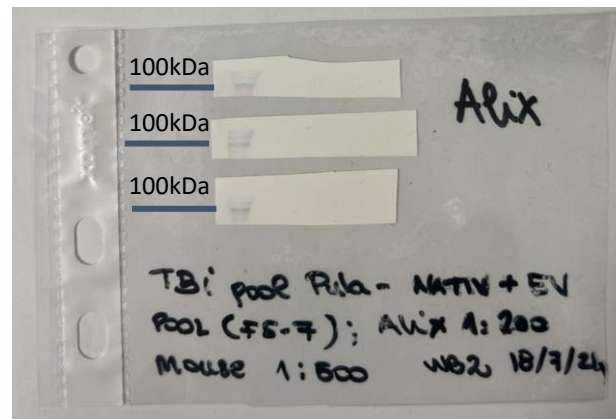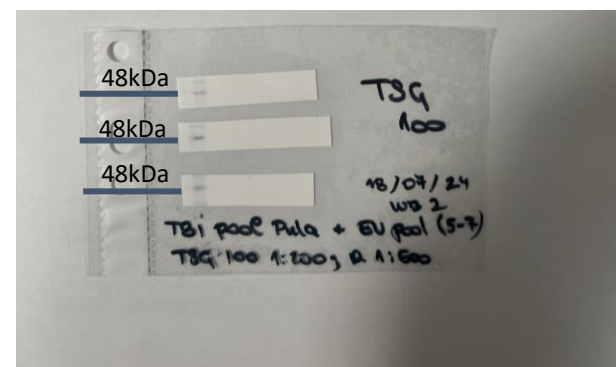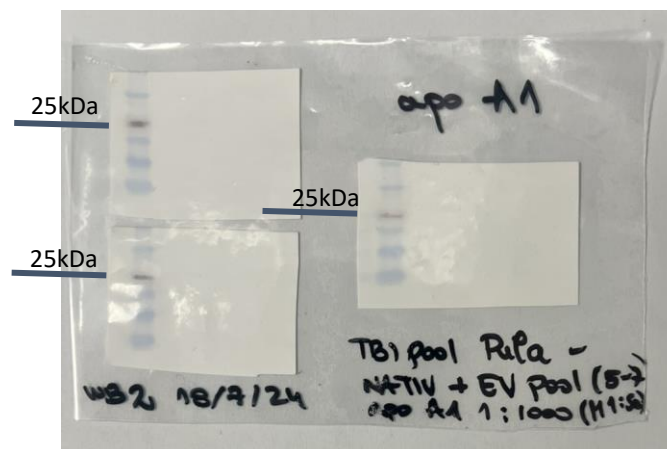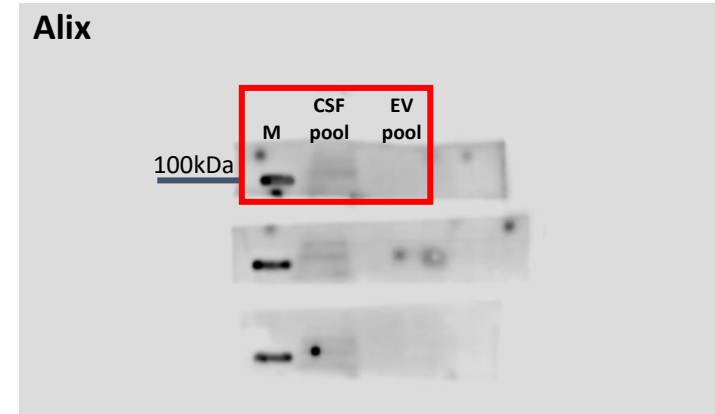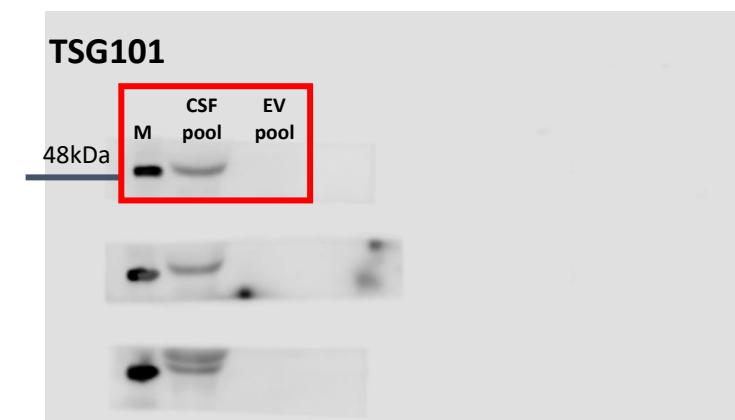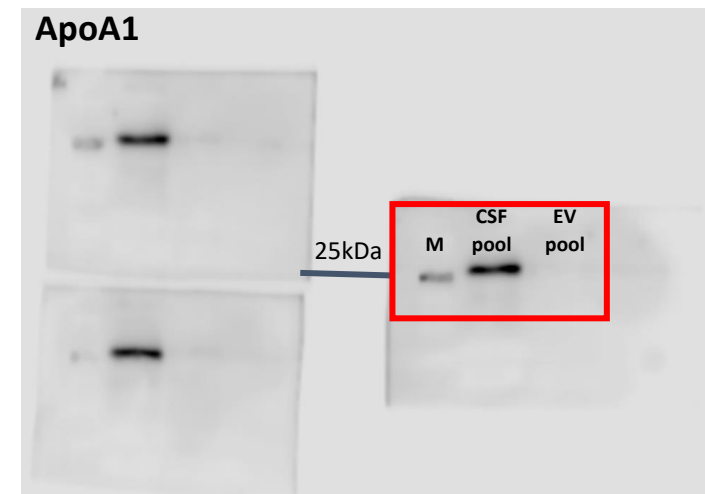

Red squares selected for Figure 1c
